# Supplementary material for: Evolutionary selection of proteins with two folds
Source: PubMed Central journal article supplement (PMC10482954; doi:10.1038/s41467-023-41237-2), 2023-09-06
Supplement: 41467_2023_41237_MOESM1_ESM.pdf [file 41467_2023_41237_MOESM1_ESM.pdf]

Supplementary Information for  
Evolutionary selection of proteins with two folds  
<sup>1</sup>Joseph W. Schafer and <sup>1,2</sup>Lauren L. Porter\*

<sup>1</sup>National Library of Medicine, National Center for Biotechnology Information, National Institutes of Health, Bethesda, MD 20894, USA

<sup>2</sup>National Heart, Lung, and Blood Institute, Biochemistry and Biophysics Center, National Institutes of Health, Bethesda, MD 20892, USA

\*Corresponding Author: [lauren.porter@nih.gov](mailto:lauren.porter@nih.gov)

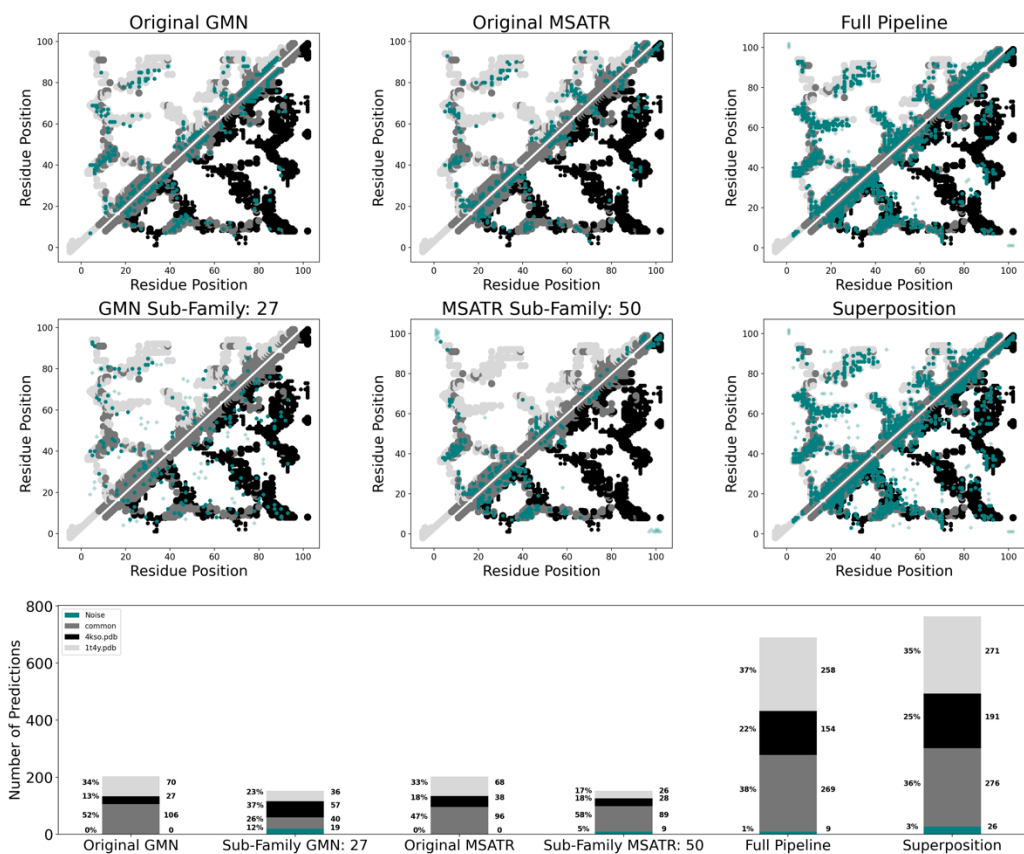

Supplementary Figure 1: Our approach enhances predictions of coevolved amino acid pairs: example 1 of 10. All six upper panels show predicted contacts referenced against contacts from two experimentally determined structures of KaiB with PDB codes 5JYT (dominant conformation) and 4KSO (alternative conformation). Color schemes of these six panels follow: experimentally determined contacts unique to the dominant conformation (light gray), alternative conformation (black), common to both conformations (dark gray), interchain contacts from homomers (small circles), predicted contacts (teal) corresponding to experimentally determined structures (opaque circles), predicted contacts not corresponding to experimentally determined structures (noise, translucent diamonds). Panels, top-to-bottom, left-to-right show the experimentally determined contacts underlying: GREMLIN predictions from the original MSA (Original GMN) and the shallowest subfamily MSA (GMN subfamily, 25 indicates minimum %sequence identity to query); MSA Transformer predictions from the original MSA (Original MSATR) and the shallowest subfamily MSA (MSATR subfamily, 49 indicates minimum %sequence identity to query); predictions from our approach after noise filtering (Full Pipeline) and before noise filtering (Superposition). Predicted contacts from each panel are tabulated by overlap with experimentally determined contacts in the bar graph: dominant (light gray); alternative (black); common (dark gray); noise (teal). Predicted contacts from GREMLIN and MSA Transformer are often redundant; signal increases from our approach are shown in Supplementary Figure 12.

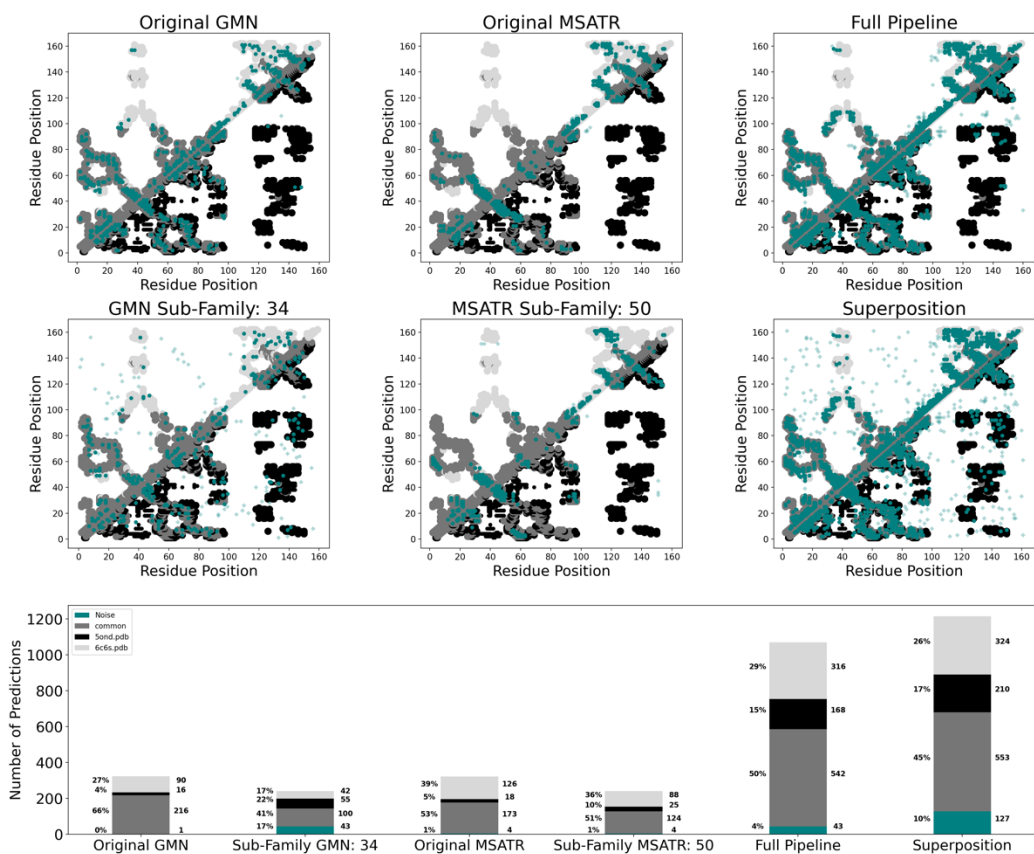

Supplementary Figure 2: Our approach enhances predictions of coevolved amino acid pairs: example 2 of 10. All six upper panels show predicted contacts referenced against contacts from two experimentally determined structures of RfaH with PDB codes 6C6S (dominant conformation) and 5OND (alternative conformation). Color schemes of these six panels follow: experimentally determined contacts unique to the dominant conformation (light gray), alternative conformation (black), common to both conformations (dark gray), interchain contacts from homomers (small circles); predicted contacts (teal) corresponding to experimentally determined structures (opaque circles), predicted contacts not corresponding to experimentally determined structures (noise, translucent diamonds). Panels, top-to-bottom, left-to-right show the experimentally determined contacts underlying: GREMLIN predictions from the original MSA (Original GMN) and the shallowest subfamily MSA (GMN subfamily, 33 indicates minimum %sequence identity to query); MSA Transformer predictions from the original MSA (Original MSATR) and the shallowest subfamily MSA (MSATR subfamily, 38 indicates minimum %sequence identity to query); predictions from our approach after noise filtering (Full Pipeline) and before noise filtering (Superposition). Predicted contacts from each panel are tabulated by overlap with experimentally determined contacts in the bar graph: dominant (light gray); alternative (black); common (dark gray); noise (teal). Predicted contacts from GREMLIN and MSA Transformer are often redundant; signal increases from our approach are shown in Supplementary Figure 12

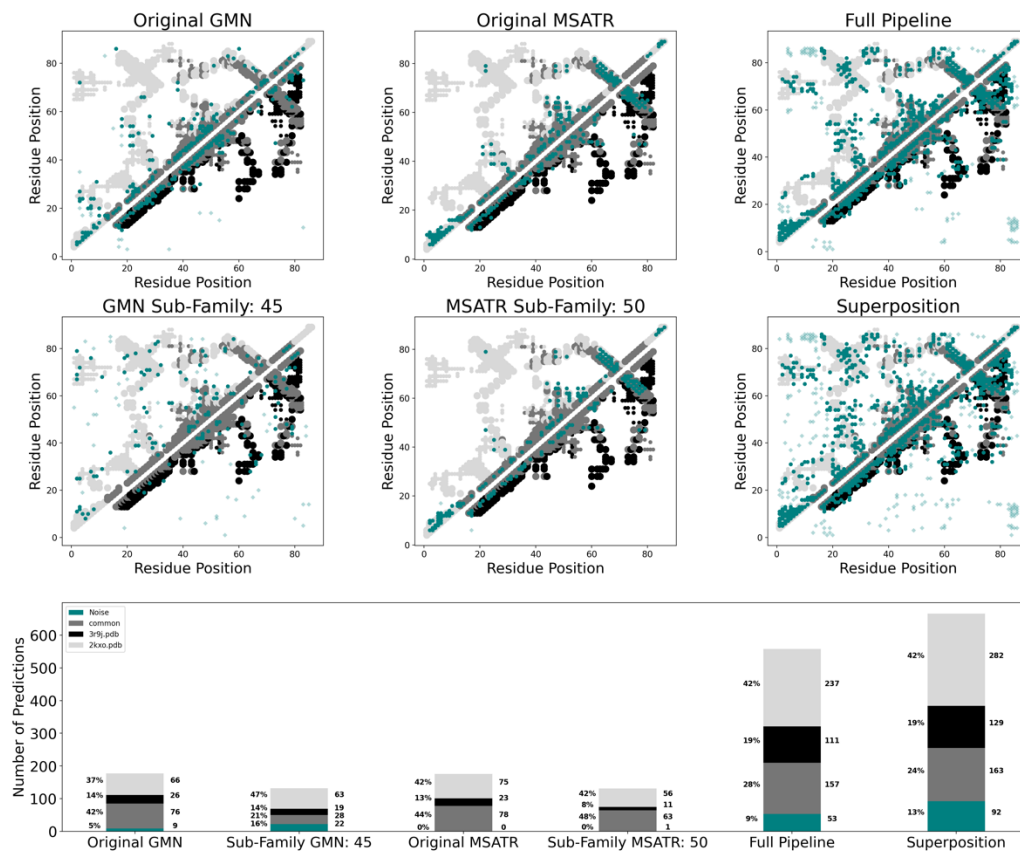

Supplementary Figure 3: Our approach enhances predictions of coevolved amino acid pairs: example 3 of 10. All six upper panels show predicted contacts referenced against contacts from two experimentally determined structures of MinE with PDB codes 2KXO (dominant conformation) and 3R9J (alternative conformation). Color schemes of these six panels follow: experimentally determined contacts unique to the dominant conformation (light gray), alternative conformation (black), common to both conformations (dark gray), interchain contacts from homomers (small circles); predicted contacts (teal) corresponding to experimentally determined structures (opaque circles), predicted contacts not corresponding to experimentally determined structures (noise, translucent diamonds). Panels, top-to-bottom, left-to-right show the experimentally determined contacts underlying: GREMLIN predictions from the original MSA (Original GMN) and the shallowest subfamily MSA (GMN subfamily, 43 indicates minimum %sequence identity to query); MSA Transformer predictions from the original MSA (Original MSATR) and the shallowest subfamily MSA (MSATR subfamily, 47 indicates minimum %sequence identity to query); predictions from our approach after noise filtering (Full Pipeline) and before noise filtering (Superposition). Predicted contacts from each panel are tabulated by overlap with experimentally determined contacts in the bar graph: dominant (light gray); alternative (black); common (dark gray); noise (teal). Predicted contacts from GREMLIN and MSA Transformer are often redundant; signal increases from our approach are shown in Supplementary Figure 12.

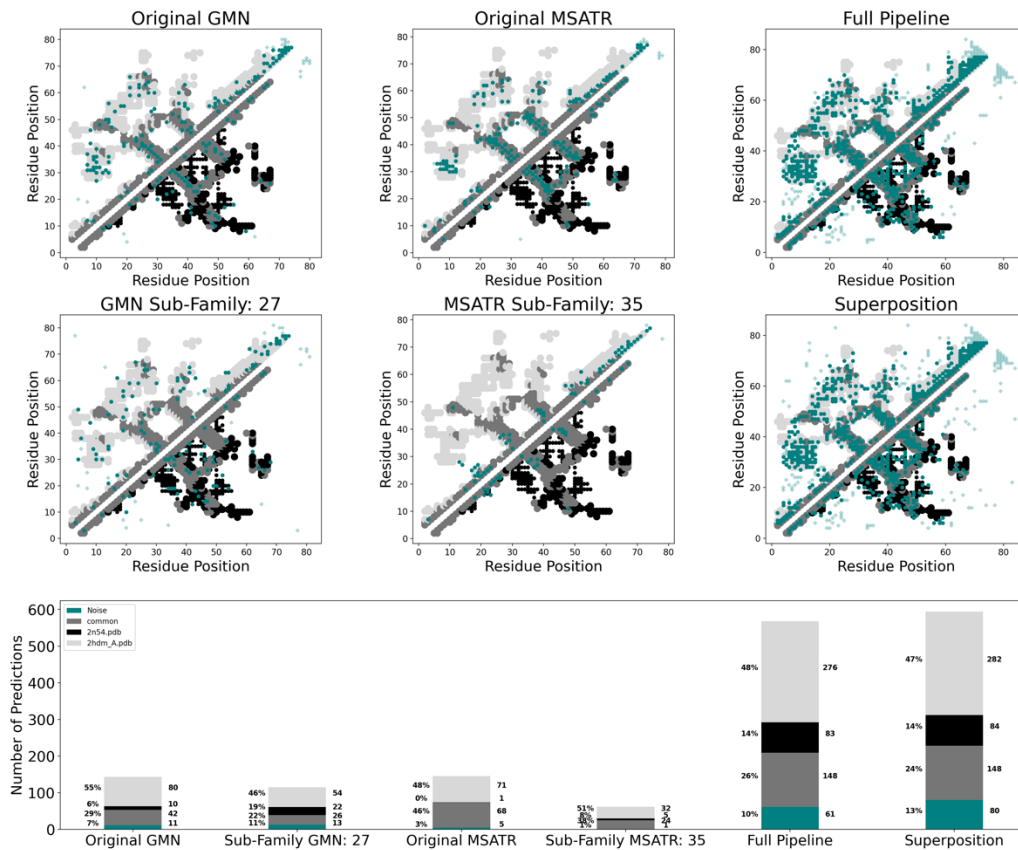

Supplementary Figure 4: Our approach enhances predictions of coevolved amino acid pairs: example 4 of 10. All six upper panels show predicted contacts referenced against contacts from two experimentally determined structures of XCL1 with PDB codes 2HDM (dominant conformation) and 2N54 (alternative conformation). Color schemes of these six panels follow: experimentally determined contacts unique to the dominant conformation (light gray), alternative conformation (black), common to both conformations (dark gray), interchain contacts from homomers (small circles); predicted contacts (teal) corresponding to experimentally determined structures (opaque circles), predicted contacts not corresponding to experimentally determined structures (noise, translucent diamonds). Panels, top-to-bottom, left-to-right show the experimentally determined contacts underlying: GREMLIN predictions from the original MSA (Original GMN) and the shallowest subfamily MSA (GMN subfamily, 28 indicates minimum %sequence identity to query); MSA Transformer predictions from the original MSA (Original MSATR) and the shallowest subfamily MSA (MSATR subfamily, 38 indicates minimum %sequence identity to query); predictions from our approach after noise filtering (Full Pipeline) and before noise filtering (Superposition). Predicted contacts from each panel are tabulated by overlap with experimentally determined contacts in the bar graph: dominant (light gray); alternative (black); common (dark gray); noise (teal). Predicted contacts from GREMLIN and MSA Transformer are often redundant; signal increases from our approach are shown in Supplementary Figure 12.

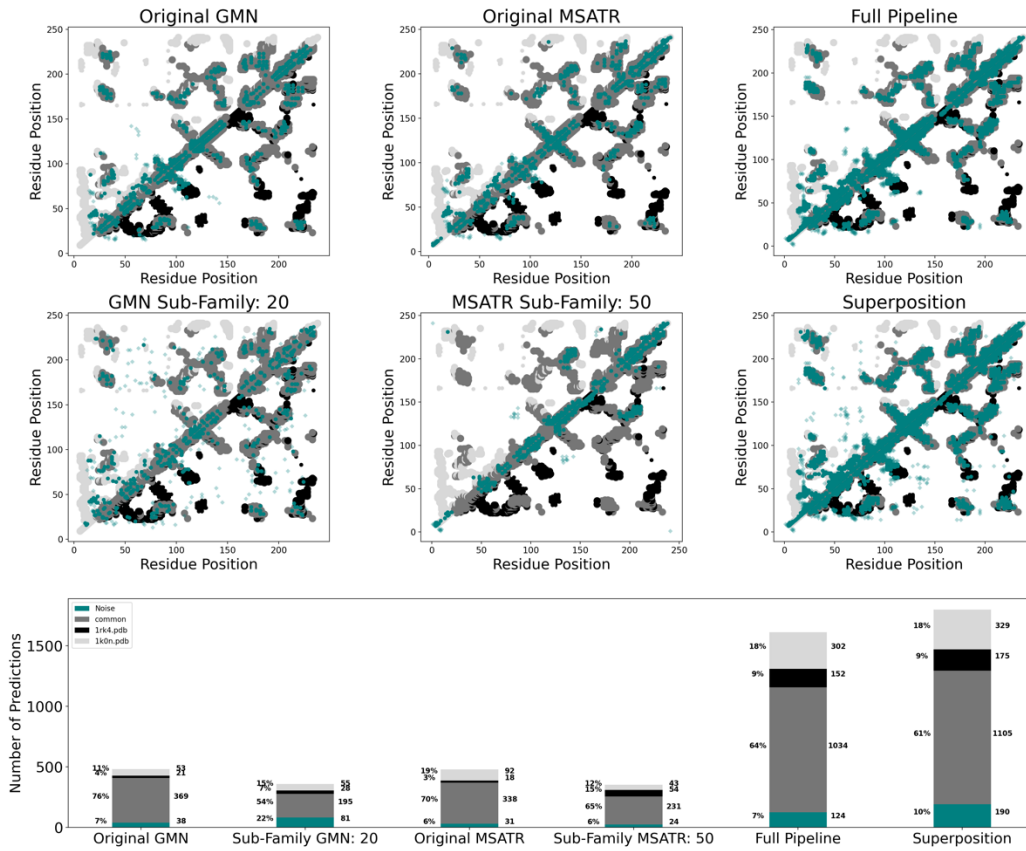

Supplementary Figure 5: Our approach enhances predictions of coevolved amino acid pairs: example 5 of 10. All six upper panels show predicted contacts referenced against contacts from two experimentally determined structures of CLIC1 with PDB codes 1K0N (dominant conformation) and 1RK4 (alternative conformation). Color schemes of these six panels follow: experimentally determined contacts unique to the dominant conformation (light gray), alternative conformation (black), common to both conformations (dark gray), interchain contacts from homomers (small circles); predicted contacts (teal) corresponding to experimentally determined structures (opaque circles), predicted contacts not corresponding to experimentally determined structures (noise, translucent diamonds). Panels, top-to-bottom, left-to-right show the experimentally determined contacts underlying: GREMLIN predictions from the original MSA (Original GMN) and the shallowest subfamily MSA (GMN subfamily, 21 indicates minimum %sequence identity to query); MSA Transformer predictions from the original MSA (Original MSATR) and the shallowest subfamily MSA (MSATR subfamily, 23 indicates minimum %sequence identity to query); predictions from our approach after noise filtering (Full Pipeline) and before noise filtering (Superposition). Predicted contacts from each panel are tabulated by overlap with experimentally determined contacts in the bar graph: dominant (light gray); alternative (black); common (dark gray); noise (teal). Predicted contacts from GREMLIN and MSA Transformer are often redundant; signal increases from our approach are shown in Supplementary Figure 12.

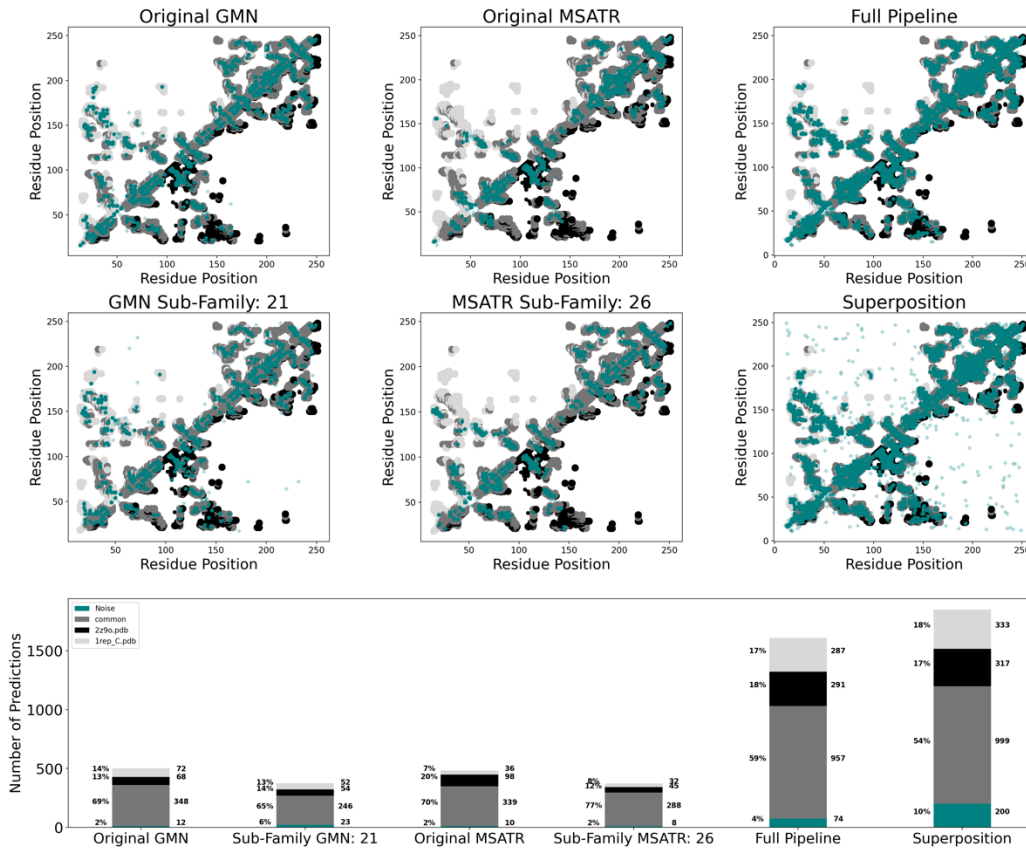

Supplementary Figure 6: Our approach enhances predictions of coevolved amino acid pairs: example 6 of 10. All six upper panels show predicted contacts referenced against contacts from two experimentally determined structures of RepE with PDB codes 2Z9O (dominant conformation) and IREP (alternative conformation). Color schemes of these six panels follow: experimentally determined contacts unique to the dominant conformation (light gray), alternative conformation (black), common to both conformations (dark gray), interchain contacts from homomers (small circles); predicted contacts (teal) corresponding to experimentally determined structures (opaque circles), predicted contacts not corresponding to experimentally determined structures (noise, translucent diamonds). Panels, top-to-bottom, left-to-right show the experimentally determined contacts underlying: GREMLIN predictions from the original MSA (Original GMN) and the shallowest subfamily MSA (GMN subfamily, 21 indicates minimum %sequence identity to query); MSA Transformer predictions from the original MSA (Original MSATR) and the shallowest subfamily MSA (MSATR subfamily, 24 indicates minimum %sequence identity to query); predictions from our approach after noise filtering (Full Pipeline) and before noise filtering (Superposition). Predicted contacts from each panel are tabulated by overlap with experimentally determined contacts in the bar graph: dominant (light gray); alternative (black); common (dark gray); noise (teal). Predicted contacts from GREMLIN and MSA Transformer are often redundant; signal increases from our approach are shown in Supplementary Figure 12.

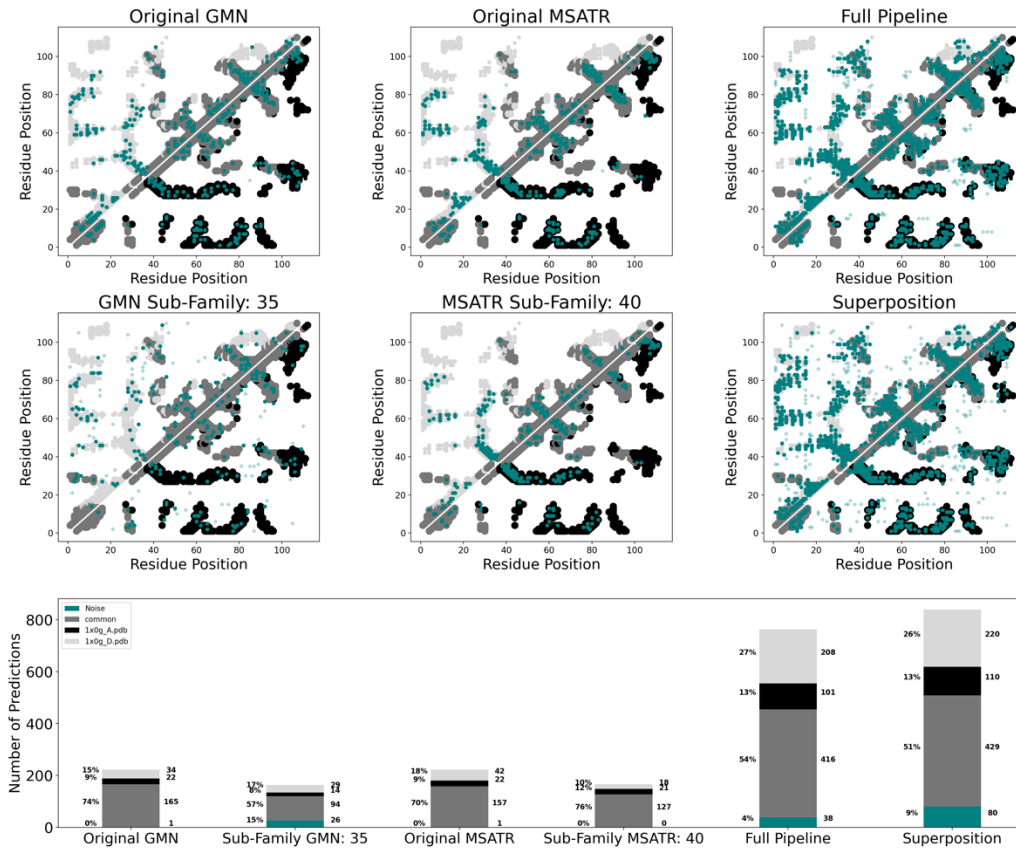

Supplementary Figure 7: Our approach enhances predictions of coevolved amino acid pairs: example 7 of 10. All six upper panels show predicted contacts referenced against contacts from two experimentally determined structures of *IscA* with PDB codes 1X0G chain D (dominant conformation) and 1X0G chain A (alternative conformation). Color schemes of these six panels follow: experimentally determined contacts unique to the dominant conformation (light gray), alternative conformation (black), common to both conformations (dark gray), interchain contacts from homomers (small circles); predicted contacts (teal) corresponding to experimentally determined structures (opaque circles), predicted contacts not corresponding to experimentally determined structures (noise, translucent diamonds). Panels, top-to-bottom, left-to-right show the experimentally determined contacts underlying: GREMLIN predictions from the original MSA (Original GMN) and the shallowest subfamily MSA (GMN subfamily, 35 indicates minimum %sequence identity to query); MSA Transformer predictions from the original MSA (Original MSATR) and the shallowest subfamily MSA (MSATR subfamily, 37 indicates minimum %sequence identity to query); predictions from our approach after noise filtering (Full Pipeline) and before noise filtering (Superposition). Predicted contacts from each panel are tabulated by overlap with experimentally determined contacts in the bar graph: dominant (light gray); alternative (black); common (dark gray); noise (teal). Predicted contacts from GREMLIN and MSA Transformer are often redundant; signal increases from our approach are shown in Supplementary Figure 12.



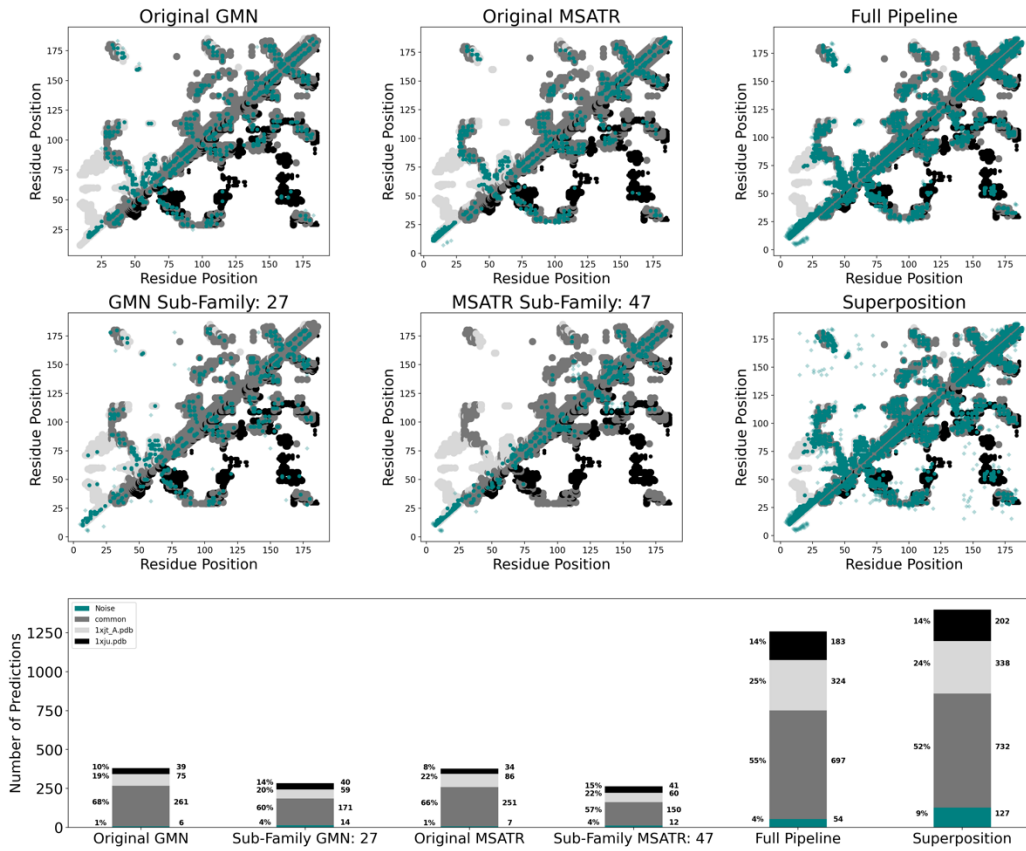

Supplementary Figure 8: Our approach enhances predictions of coevolved amino acid pairs: example 8 of 10. All six upper panels show predicted contacts referenced against contacts from two experimentally determined structures of Endolysin with PDB codes 1XJT (dominant conformation) and 1XJU (alternative conformation). Color schemes of these six panels follow: experimentally determined contacts unique to the dominant conformation (light gray), alternative conformation (black), common to both conformations (dark gray), interchain contacts from homomers (small circles); predicted contacts (teal) corresponding to experimentally determined structures (opaque circles), predicted contacts not corresponding to experimentally determined structures (noise, translucent diamonds). Panels, top-to-bottom, left-to-right show the experimentally determined contacts underlying: GREMLIN predictions from the original MSA (Original GMN) and the shallowest subfamily MSA (GMN subfamily, 38 indicates minimum %sequence identity to query); MSA Transformer predictions from the original MSA (Original MSATR) and the shallowest subfamily MSA (MSATR subfamily, 44 indicates minimum %sequence identity to query); predictions from our approach after noise filtering (Full Pipeline) and before noise filtering (Superposition). Predicted contacts from each panel are tabulated by overlap with experimentally determined contacts in the bar graph: dominant (light gray); alternative (black); common (dark gray); noise (teal). Predicted contacts from GREMLIN and MSA Transformer are often redundant; signal increases from our approach are shown in Supplementary Figure 12.

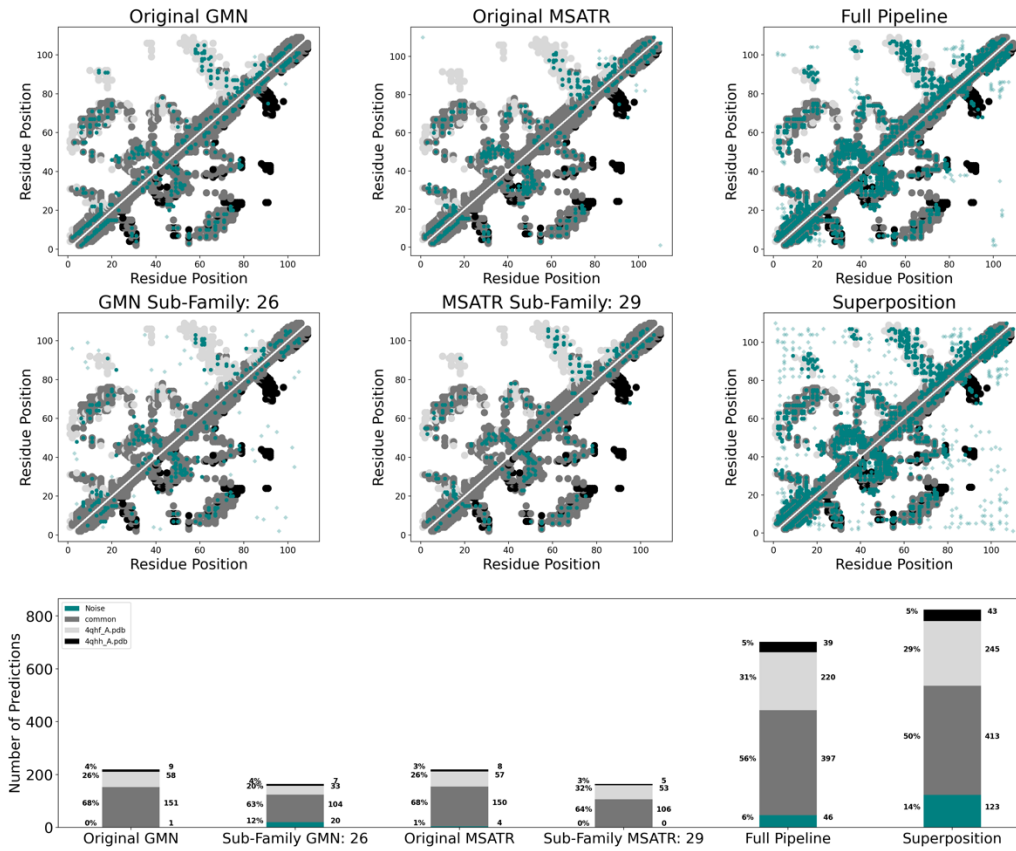

Supplementary Figure 9: Our approach enhances predictions of coevolved amino acid pairs: example 9 of 10. All six upper panels show predicted contacts referenced against contacts from two experimentally determined structures of Selecace with PDB codes 4QHF (dominant conformation) and 4QHH (alternative conformation). Color schemes of these six panels follow: experimentally determined contacts unique to the dominant conformation (light gray), alternative conformation (black), common to both conformations (dark gray), interchain contacts from homomers (small circles); predicted contacts (teal) corresponding to experimentally determined structures (opaque circles), predicted contacts not corresponding to experimentally determined structures (noise, translucent diamonds). Panels, top-to-bottom, left-to-right show the experimentally determined contacts underlying: GREMLIN predictions from the original MSA (Original GMN) and the shallowest subfamily MSA (GMN subfamily, 25 indicates minimum %sequence identity to query); MSA Transformer predictions from the original MSA (Original MSATR) and the shallowest subfamily MSA (MSATR subfamily, 28 indicates minimum %sequence identity to query); predictions from our approach after noise filtering (Full Pipeline) and before noise filtering (Superposition). Predicted contacts from each panel are tabulated by overlap with experimentally determined contacts in the bar graph: dominant (light gray); alternative (black); common (dark gray); noise (teal). Predicted contacts from GREMLIN and MSA Transformer are often redundant; signal increases from our approach are shown in Supplementary Figure 12.

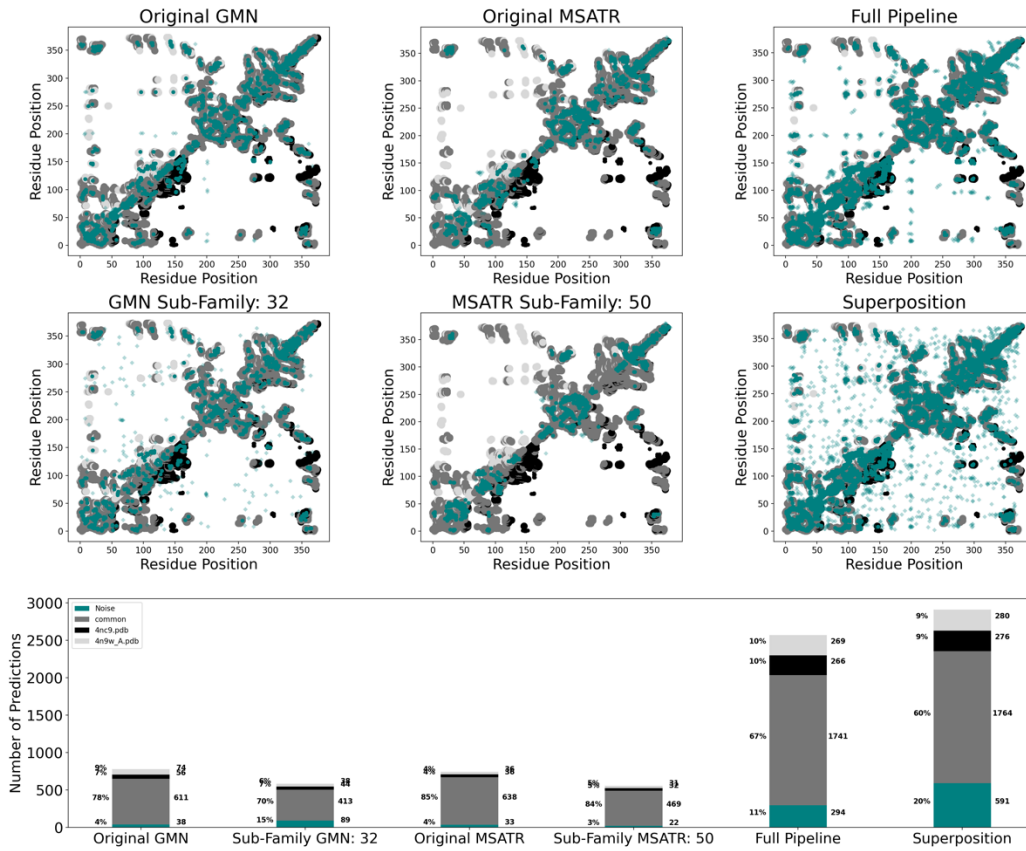

Supplementary Figure 10: Our approach enhances predictions of coevolved amino acid pairs: example 10 of 10. All six upper panels show predicted contacts referenced against contacts from two experimentally determined structures of PimA with PDB codes 4N9W (dominant conformation) and 4NC9 (alternative conformation). Color schemes of these six panels follow: experimentally determined contacts unique to the dominant conformation (light gray), alternative conformation (black), common to both conformations (dark gray), interchain contacts from homomers (small circles); predicted contacts (teal) corresponding to experimentally determined structures (opaque circles), predicted contacts not corresponding to experimentally determined structures (noise, translucent diamonds). Panels, top-to-bottom, left-to-right show the experimentally determined contacts underlying: GREMLIN predictions from the original MSA (Original GMN) and the shallowest subfamily MSA (GMN subfamily, 31 indicates minimum %sequence identity to query); MSA Transformer predictions from the original MSA (Original MSATR) and the shallowest subfamily MSA (MSATR subfamily, 49 indicates minimum %sequence identity to query); predictions from our approach after noise filtering (Full Pipeline)

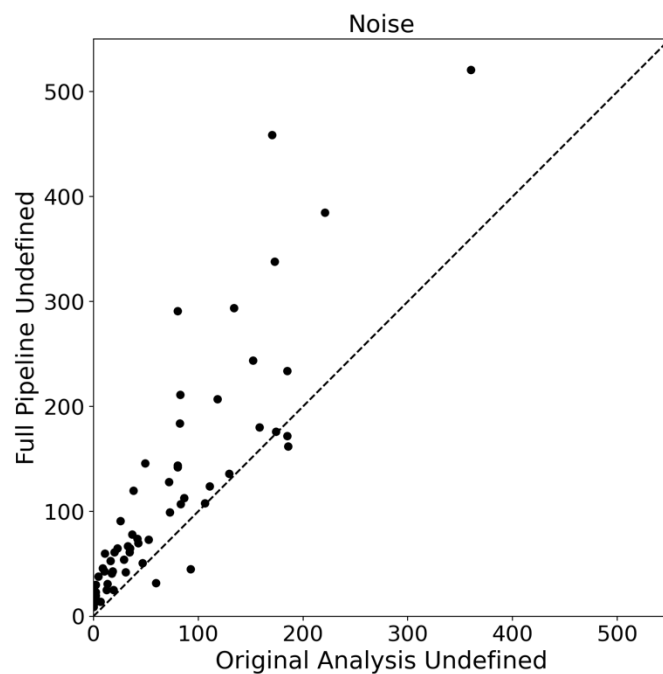

*Supplementary Figure 11 Comparison of noise from our pipeline with noise from coevolutionary analysis (GREMLIN+MSA Transformer) on deep MSAs only. Mean/median noise increases were 47%/42%, significantly less than the increase in alternative contacts (mean/median 200%/187%, Supplementary Figure 12a).*

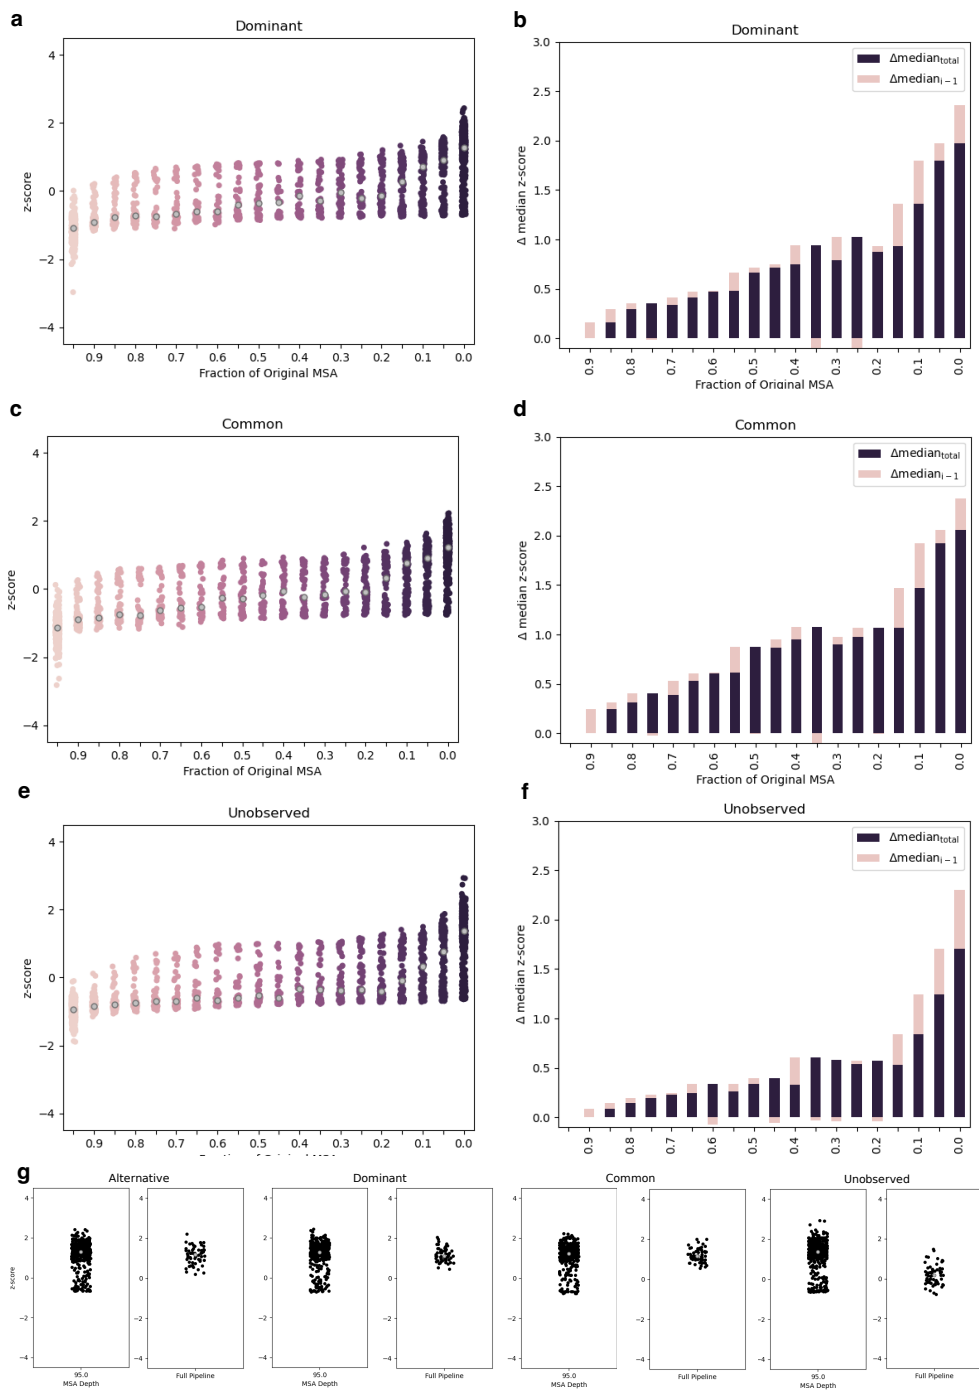

Supplementary Figure 12. Contact predictions are enhanced by subfamily MSAs. Distributions of z-scores of predicted contacts binned by MSA-depth for 56 fold-switching proteins are categorized by Dominant fold (fold with more unique contacts predicted by conventional coevolution, **a**), Common fold (regions of the protein with the same conformation shared by both folds, **c**), and Unobserved (predicted contacts that have not been observed experimentally, **e**). Median z-scores of each bin are gray. Bar graphs showing changes in z-scores as a function of bin size are shown for Dominant (**b**), Common (**d**), and Unobserved (**f**) predicted contacts. Purple bars are differences between median z-score of bin (gray dots in (**a,c,e**)) and median z-score of the deepest MSA. Pink bars are differences between median z-score of bin and median z-score of next deepest bin. (**g**). Filtering noise substantially impacts the z-scores of unobserved contacts but has little impact on the z-scores of Alternative, Dominant, and Common contacts.

AlphaFold2 Deep MSA  
with Templates

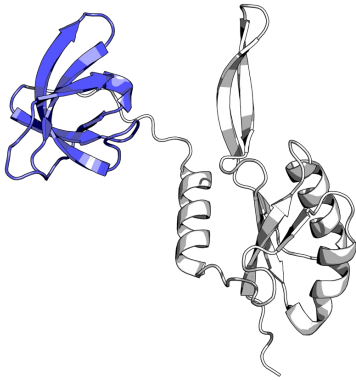

AlphaFold2 Deep MSA  
without Templates

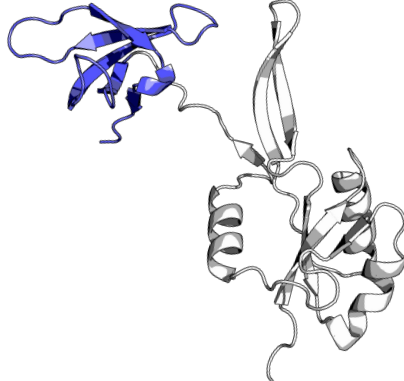

AlphaFold2 Shallow MSA  
with Templates

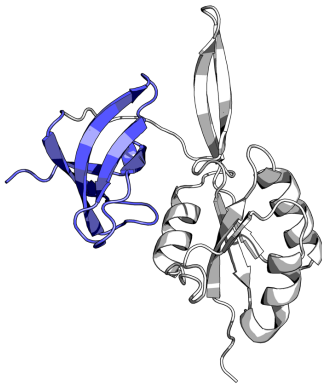

AlphaFold2 Shallow MSA  
without Templates

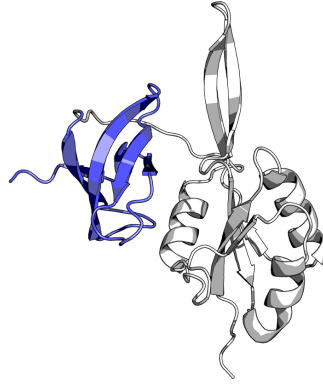

RoseTTAfold

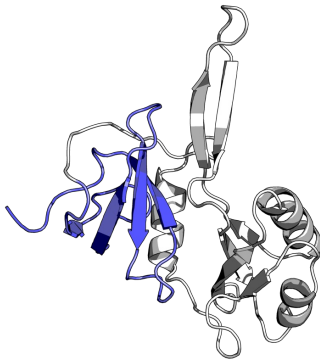

RGN2

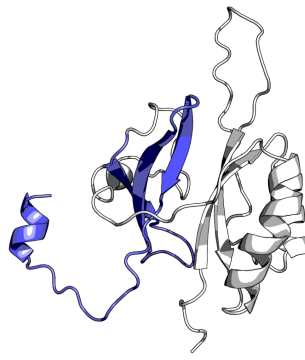

*Supplementary Figure 13. State-of-the-art methods predict that the C-terminal domain of Variant 5 (blue) assumes conformations mostly composed of  $\beta$ -sheets. Highest ranked conformers are shown, though the top 5 models from each run all show similar  $\beta$ -sheet structures. The single-folding N-terminal domain of Variant 5 is shown in white.*

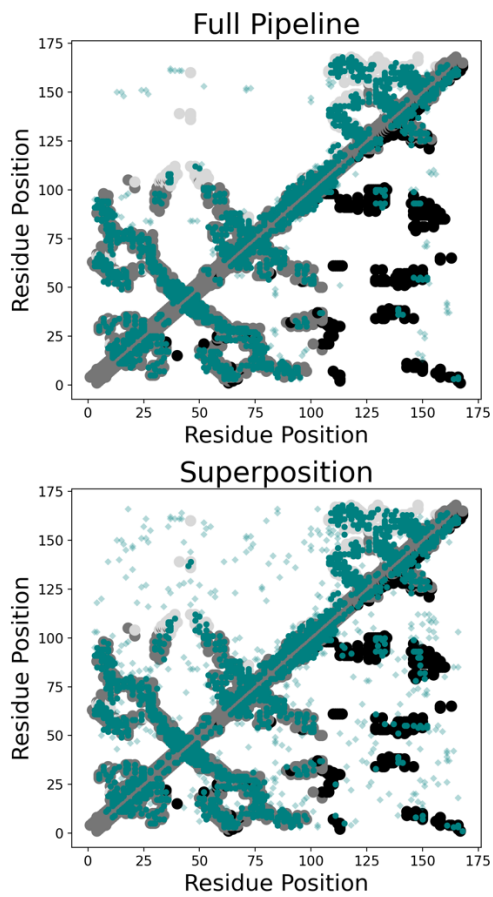

Supplementary Figure 14. Dual-fold coevolution predictions overlap with both AlphaFold2 models of Variant 5. Predicted contacts (teal) unique to the  $\beta$ -roll fold are shown on the upper diagonal (overlapping with light gray contacts from predicted structure), while contacts unique to the  $\alpha$ -helical fold are shown on the lower diagonal (overlapping with black contacts from other predicted structures). Contacts predicted in both AlphaFold2 structures are gray. Overlap can be seen after running the full pipeline with noise reduction (4% noise); more overlap, especially with the  $\alpha$ -helical fold, can be seen prior to noise reduction (12% noise).

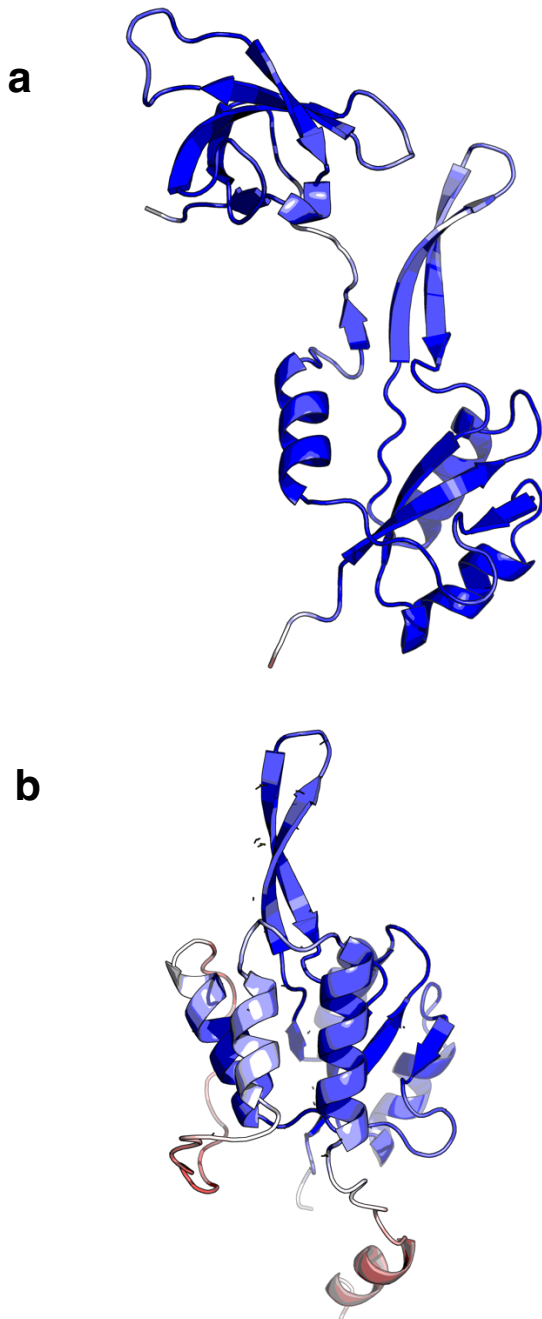

*Supplementary Figure 15. AlphaFold2 prediction confidences (pLDDT scores) for the  $\beta$ -roll (a) and  $\alpha$ -helical (b) conformations of Variant 5. Most confident scores are dark blue; least confident, red, moderate scores are white.*



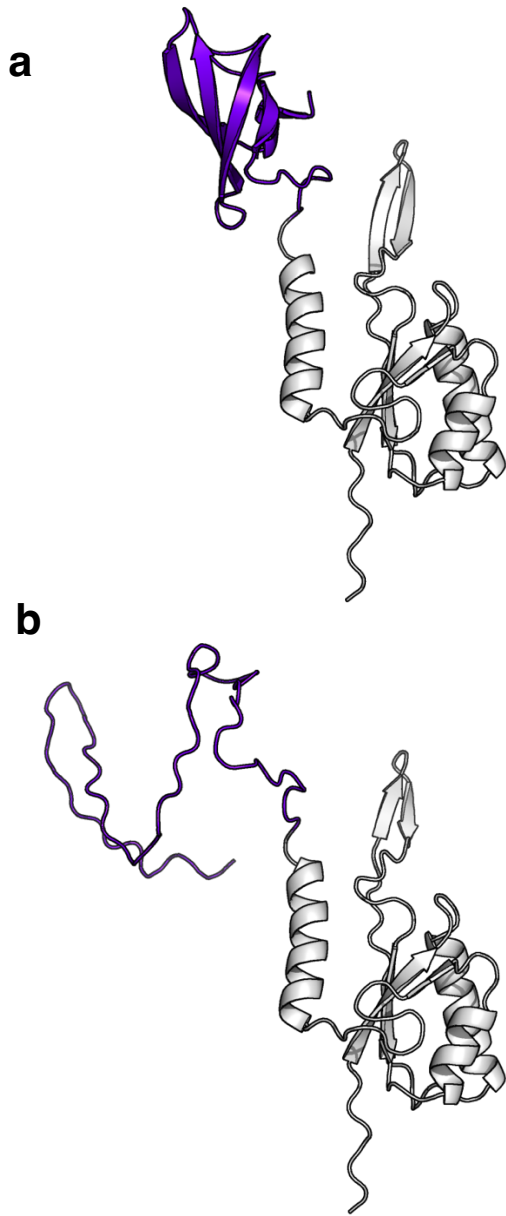

*Supplementary Figure 16. Eliminating unique  $\beta$ -sheet coevolutionary signals causes AlphaFold2 to predict an unfolded C-terminal domain (CTD) in single-folding *E. coli* NusG. AlphaFold2 correctly predicts the ground-state  $\beta$ -roll fold of NusG's CTD (purple) when supplied with an unmodified multiple sequence alignment (MSA, a). Masking coevolutionary signals unique to the  $\beta$ -roll fold causes AlphaFold2 to predict that NusG's CTD is unfolded (b). Folded N-terminal domain is colored gray in both figures.*

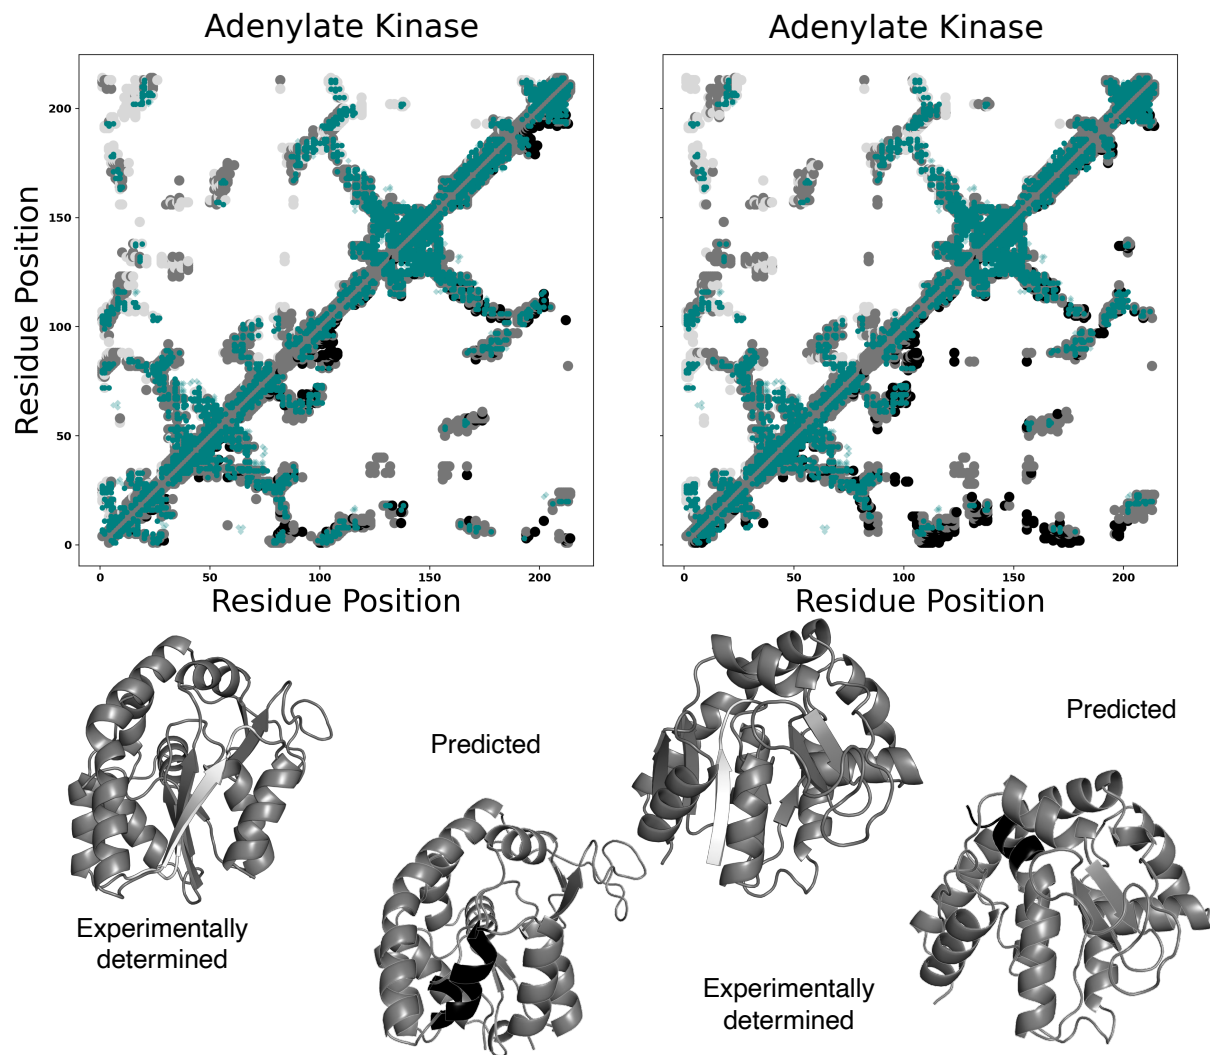

Supplementary Figure 17. Some AlphaFold2-based fold-switch predictions based on modified multiple sequence alignments (MSAs) lack strong coevolutionary signatures. Contact maps of two fold-switching predictions in Adenylate Kinase show the experimentally determined structure on the top diagonal and the ColabFold-predicted fold switched structure on the bottom. ColabFold is an efficient implementation of AlphaFold2 that generates comparable structure predictions. Many predicted coevolved contacts (teal) overlap with contacts unique to the experimentally determined structures (light gray), but few overlap with contacts unique to the alternative structures predicted by ColabFold (black). Structures of both sets of conformations are shown below their respective contact maps. Medium gray regions are common to both folds; white/black correspond to experimentally determined/AF2 prediction. PDB ID of the experimentally determined structure is 4AKE, chain A, shown in different orientations to highlight putative fold-switching regions.

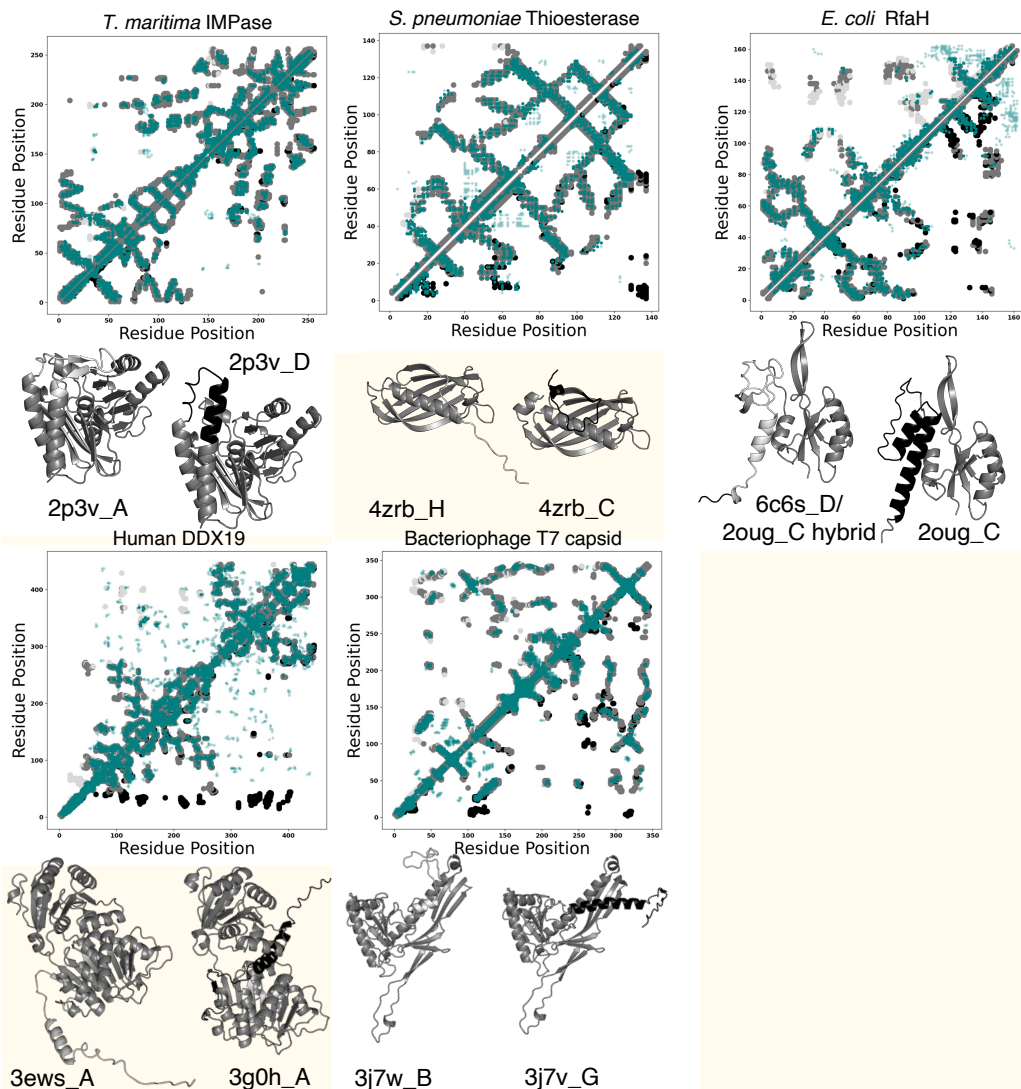

Supplementary Figure 18. Blind predictions of fold-switching proteins. Blind predictions are performed by using ColabFold and ESM-fold to each predict a structure of an amino acid sequence. ACE predicts coevolved residue pairs using the two predicted structures as references. The predicted structures are compared. Different structure predictions both consistent with coevolutionary predictions fall into Category 1, above. Predicted structures are labeled by the PDB IDs and chains to which they correspond most closely. Contact maps are shown above structures predicted by ColabFold (fold-switching regions light gray) and ESM-Fold (fold-switching regions black). Predicted contacts are teal.

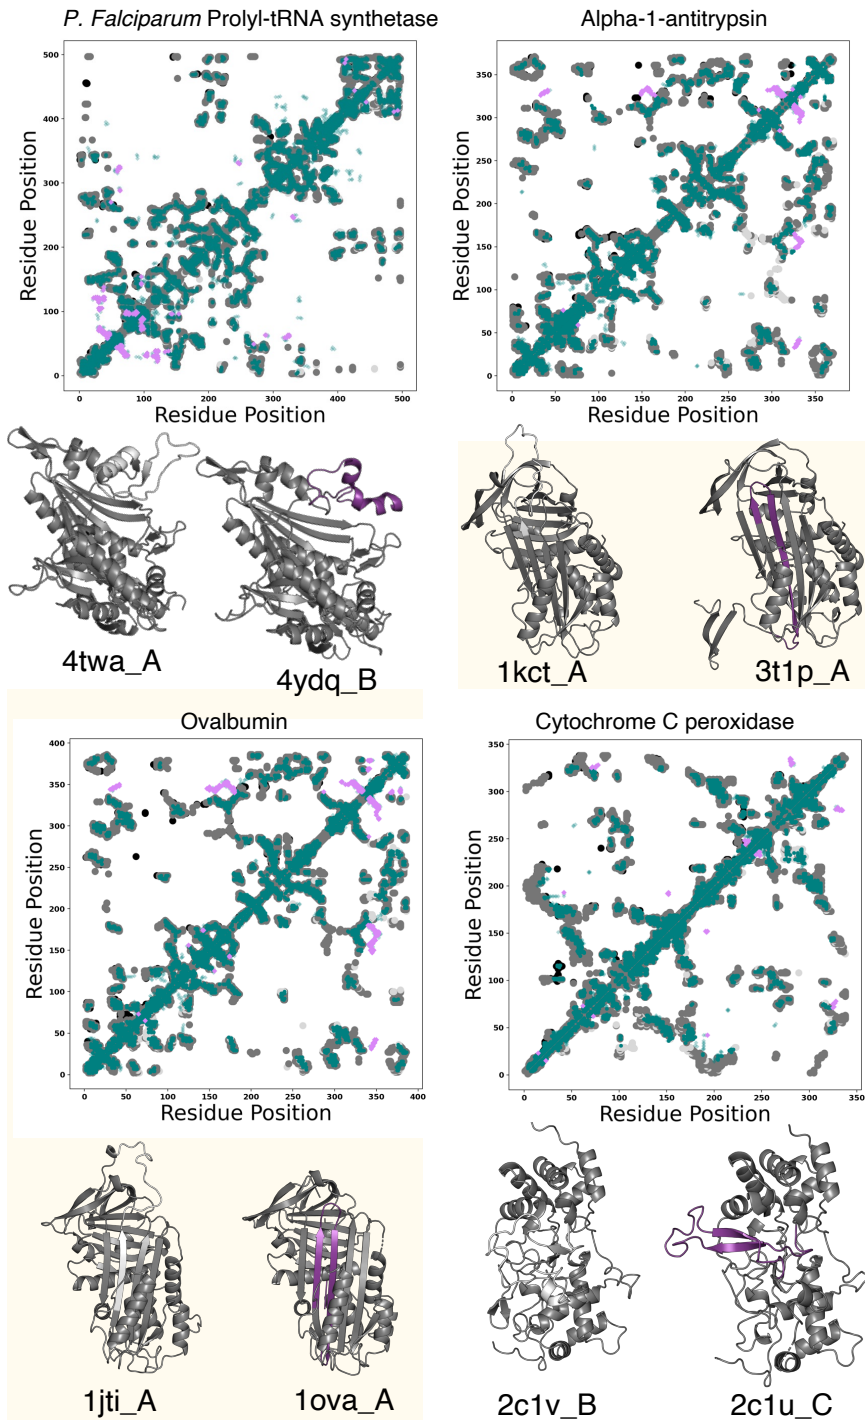

Supplementary Figure 19. Blind predictions of fold-switching proteins. Blind predictions are performed by using ColabFold and ESM-fold to each predict a structure of an amino acid sequence. ACE predicts coevolved residue pairs using the two predicted structures as references. The predicted structures are compared. Similar structure predictions with coevolutionary evidence for an alternative conformation fall into Category 2, above. Predicted structures are labeled by the PDB IDs and chains to which they correspond most closely. Contact maps are shown above structures predicted by ColabFold (fold-switching regions light gray) and ESM-Fold (fold-switching regions black). Predicted contacts are teal. ColabFold and ESM-Fold predict the same conformation. Predicted contacts corresponding to the experimentally characterized alternative conformation are orchid. Structurally conserved protein regions/common contacts are medium gray.

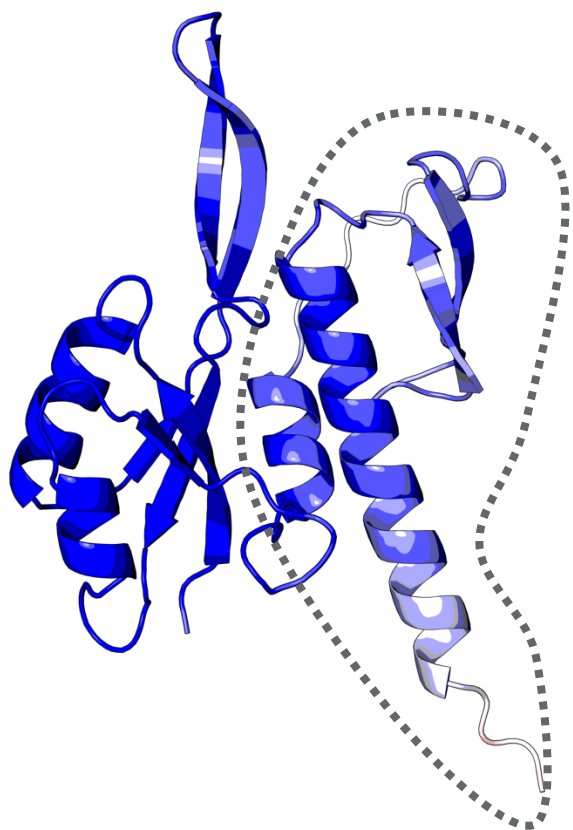

*Supplementary Figure 20. High-confidence AlphaFold2 predictions from modified MSAs can be unreliable. Running AlphaFold2 on the shallowest *E. coli* RfaH MSA used in our coevolutionary analysis yielded in incorrect prediction with high confidence (ranked 0): a CTD with mixed  $\alpha$ -helix and  $\beta$ -sheet character (surrounded by gray dots). Structure is colored by prediction confidence: most confident scores are dark blue; least confident, red, moderate scores are white.*

Supplementary Table 1: Structural information and pipeline output for 56 fold-switching proteins. PDBs A and B (PDB ID\_Chain) were used to calculate experimentally determined contacts for a given protein; sequences of blue codes were used as queries for generating deep MSAs. Name is the common name of each protein. MSA Depth is the number of sequences in the deepest MSA prepared for GREMLIN and MSA Transformer, and Neff is the number of effective sequences in the deepest MSA. L is the number of amino acids in the query sequence. GMN\_QID and MSATR\_QID are the number of subfamily alignments made from the original MSA deep enough to run each algorithm. P-values are calculated using the one-tailed hypergeometric test and represent the significance of the additional structural information obtained from the subfamily alignments. One p-value with asterisk was taken for 5\*L contacts, due its very short length, rather than 7.5\*L as for the rest (Methods).

| PDB A  | PDB B  | Name                       | MSA Depth | Neff    | L   | GMN_QID | MSATR_QID | P-value   |
|--------|--------|----------------------------|-----------|---------|-----|---------|-----------|-----------|
| 1k0n_A | 1rk4_A | CLIC1                      | 53571     | 30669.7 | 198 | 14      | 17        | 0         |
| 2p3v_A | 2p3v_D | IMPase                     | 51161     | 32813.9 | 248 | 26      | 28        | 0         |
| 5jyt_A | 4kso_A | KaiB                       | 40770     | 24766.0 | 90  | 22      | 41        | 0         |
| 4zrb_C | 4zrb_H | Thioesterase               | 32221     | 18274.6 | 126 | 21      | 22        | 2.18E-174 |
| 1jfk_A | 2nxq   | CaBP                       | 28719     | 17789.4 | 131 | 21      | 25        | 3.34E-217 |
| 2k0q_A | 2lel_A | CopK                       | 28288     | 24441.6 | 67  | 18      | 22        | 5.08E-30  |
| 1miq_B | 1qs8_B | Proplasmepsin              | 23159     | 15978.4 | 320 | 20      | 27        | 0         |
| 1nqd_A | 1nqj_B | CBD                        | 22522     | 19969.0 | 113 | 21      | 24        | 4.14E-199 |
| 1x0g_A | 1x0g_D | IscA                       | 21882     | 10482.2 | 106 | 31      | 33        | 1.28E-128 |
| 4gqc_B | 4gqc_C | PrxQ                       | 20175     | 10909.3 | 151 | 23      | 26        | 3.85E-298 |
| 2c1u_C | 2c1v_B | Cytochrome C<br>Peroxidase | 19035     | 12824.6 | 308 | 30      | 36        | 0         |
| 2uy7_D | 5flu_E | papA                       | 18658     | 13019.7 | 152 | 23      | 28        | 1.85E-284 |
| 2jmr_A | 4j3o_F | fimF                       | 18642     | 13231.8 | 150 | 25      | 28        | 5.09E-244 |
| 3low_A | 3m1b_F | Beta-2-<br>Microglobulin   | 17286     | 9085.7  | 96  | 29      | 38        | 1.40E-77  |
| 5ond_A | 6c6s_D | RfaH                       | 17278     | 10318.5 | 160 | 25      | 32        | 1.01E-232 |
| 4pyi_A | 4pyj_A | COMT                       | 16360     | 10138.6 | 208 | 22      | 33        | 6.52E-288 |
| 4qhf_A | 4qhh_A | Selecase                   | 15077     | 9500.2  | 101 | 17      | 21        | 2.39E-89  |
| 1jti_A | 1ova_A | Ovalbumin                  | 15075     | 10168.2 | 372 | 23      | 32        | 0         |
| 1mnm_C | 1mnm_D | MCM1                       | 14095     | 5811.2  | 72  | 23      | 26        | 3.42E-48  |
| 3uyi_A | 3v0t_A | Perakine<br>Reductase      | 13385     | 6113.7  | 324 | 17      | 19        | 0         |
| 5f3k_A | 5f5r_B | hTrap1<br>amyloid          | 11089     | 5132.3  | 212 | 30      | 34        | 6.78E-224 |
| 2mwf_A | 2nnt_A | protofilament              | 11073     | 6125.0  | 36  | 44      | 46        | 0.0091*   |
| 1uxm_K | 2nam_A | SOD1                       | 10984     | 6634.0  | 149 | 36      | 36        | 0         |
| 4aal_A | 4aan_A | MacA                       | 10597     | 6940.6  | 312 | 21      | 26        | 0         |
| 3j7v_G | 3j7w_B | Capsid Protein             | 8922      | 6322.3  | 308 | 11      | 13        | 0         |
| 3ejh_A | 3m7p_A | FN1                        | 8708      | 4536.3  | 87  | 23      | 31        | 4.28E-293 |
| 3hde_A | 3hdf_A | Lysozyme                   | 8612      | 5882.3  | 149 | 29      | 36        | 3.88E-303 |
| 2kxo_A | 3r9j_C | MinE                       | 8461      | 3963.8  | 83  | 42      | 48        | 6.02E-63  |
| 2axz_A | 2grm_B | PrgX                       | 8259      | 6699.6  | 301 | 11      | 15        | 0         |
| 1kct_A | 3t1p_A | Alpha-1-<br>Antitrypsin    | 8073      | 4982.4  | 368 | 14      | 22        | 0         |

|        |        |                         |      |        |     |    |    |           |
|--------|--------|-------------------------|------|--------|-----|----|----|-----------|
| 2qqj_A | 4qds_A | NRP2                    | 8058 | 5002.7 | 166 | 22 | 25 | 0         |
| 4twa_A | 4ydq_B | PRS                     | 7206 | 3394.2 | 477 | 15 | 18 | 0         |
| 4xws_D | 4y0m_J | OxyR                    | 7202 | 4156.6 | 218 | 18 | 28 | 1.04E-171 |
| 3ifa_A | 5et5_A | FBP2                    | 6958 | 3372.0 | 328 | 24 | 30 | 0         |
| 1rep_C | 2z9o_B | RepE                    | 6279 | 4580.3 | 239 | 17 | 21 | 0         |
| 2wcd_X | 4phq_A | ClyA                    | 5924 | 4387.3 | 289 | 8  | 16 | 0         |
| 4n9w_A | 4nc9_C | PimA                    | 5794 | 3989.8 | 371 | 17 | 35 | 0         |
| 4o01_D | 4o0p_A | bphP                    | 5427 | 3552.0 | 495 | 12 | 14 | 0         |
| 1xjt_A | 1xju_B | lysa                    | 4800 | 3397.4 | 156 | 18 | 27 | 1.28E-298 |
| 5c1v_A | 5c1v_B | CALNA                   | 4206 | 2071.1 | 301 | 13 | 17 | 1.18E-308 |
| 1rkp_A | 2h44_A | PDE5A1                  | 4117 | 2732.1 | 315 | 16 | 29 | 0         |
| 2lep_A | 4hdd_A | GlpG                    | 4114 | 3322.2 | 74  | 28 | 37 | 2.61E-23  |
| 5b3z_A | 5bmy_A | hPin1                   | 3871 | 2402.1 | 389 | 8  | 10 | 0         |
| 2hdm_A | 2n54_B | XCL1                    | 3137 | 1968.2 | 68  | 24 | 34 | 1.68E-52  |
| 4rwn_A | 4rwb_B | OAS1                    | 2866 | 1880.4 | 342 | 7  | 26 | 0         |
| 4q79_F | 4uv2_D | CsgG                    | 2635 | 1526.4 | 250 | 11 | 33 | 0         |
| 4dxr_A | 4dxt_A | SUN2                    | 2525 | 1711.3 | 192 | 23 | 36 | 1.52E-138 |
| 2vfx_L | 3gmh_L | Mad2                    | 2501 | 1622.1 | 201 | 12 | 36 | 8.36E-131 |
| 1cee_B | 2k42_A | WASP                    | 1679 | 1027.3 | 56  | 26 | 40 | 3.41E-49  |
| 3zwg_N | 4tsy_D | FraC                    | 1198 | 863.4  | 170 | 7  | 21 | 6.08E-237 |
| 1zk9_A | 3jv6_A | RelB                    | 1121 | 578.9  | 99  | 16 | 29 | 0         |
| 4jph_B | 5hk5_H | Grem2                   | 978  | 426.8  | 120 | 6  | 17 | 4.68E-124 |
| 1ebo_E | 5fhc_J | viral fusion<br>protein | 869  | 496.8  | 92  | 8  | 21 | 5.57E-62  |
| 1iyt_A | 2nao_F | beta-amyloid<br>protein | 780  | 206.6  | 33  | 15 | 19 | 2.70E-08  |
| 3ews_A | 3g0h_A | DDX19                   | 5484 | 2478.6 | 390 | 9  | 23 | 0         |
| 2ged_A | 1nrj_B | SRP                     | 4022 | 2036.0 | 165 | 15 | 20 | 4.19E-139 |

Supplementary Table 2. Correspondence between experimentally observed and dominant contacts. Conformations are ordered to be experimentally consistent; protein pairs whose predictions do not match experiment are highlighted orange. Conformations equally populated at equilibrium are marked with \*\*. PDB ID format: ID Chain.

| Protein Pair | Dominant | Alternative | Protein Pair | Dominant | Alternative |
|--------------|----------|-------------|--------------|----------|-------------|
| 1            | 2k42_A   | 1cee_B      | 30           | 3ejh_A   | 3m7p_A      |
| 2            | 5fhc_J   | 1ebo_E      | 31           | 3hde_A   | 3hdf_A      |
| 3            | 1iyt_A   | 2nao_F      | 32           | 5et5_A   | 3ifa_A      |
| 4            | 1jfk_A   | 2nxq_B      | 33           | 3j7w_B** | 3j7v_G**    |
| 5            | 1jti_A   | 1ova_A      | 34           | 3m1b_F   | 3low_A      |
| 6            | 1k0n_A   | 1rk4_B      | 35           | 3uyi_A   | 3v0t_A      |
| 7            | 1kct_A   | 3t1p_A      | 36           | 3zww_N   | 4tsy_D      |
| 8            | 1qs8_B   | 1miq_B      | 37           | 4aan_A   | 4aal_A      |
| 9            | 1nmn_D** | 1nmn_C**    | 38           | 4dxt_A   | 4dxr_A      |
| 10           | 1nqj_B   | 1nqd_A      | 39           | 4ggc_C   | 4ggc_B      |
| 11           | 1rep_C   | 2z9o_B      | 40           | 4jph_B   | 5hk5_H      |
| 12           | 2h44_A   | 1rkp_A      | 41           | 4n9w_A   | 4nc9_C      |
| 13           | 4kso_A   | 5jyt_A      | 42           | 4o0p_A   | 4o0l_D      |
| 14           | 1uxm_K   | 2nam_A      | 43           | 4pyi_A   | 4pyj_A      |
| 15           | 1x0g_D** | 1x0g_A**    | 44           | 4uv2_D   | 4q79_F      |
| 16           | 1xjt_A   | 1xju_B      | 45           | 4qhf_A   | 4qhh_A      |
| 17           | 3jv6_A   | 1zk9_A      | 46           | 4rwn_A   | 4rwq_B      |
| 18           | 2grm_B   | 2axz_A      | 47           | 4twa_A   | 4ydq_B      |
| 19           | 2hdm_A** | 2n54_B**    | 48           | 4y0m_J   | 4xws_D      |
| 20           | 2jmr_A   | 4j3o_F      | 49           | 4zrb_C   | 4zrb_H      |
| 21           | 2k0q_A   | 2lel_A      | 50           | 5b3z_A   | 5bmy_A      |
| 22           | 2kxo_A   | 3rj9_C      | 51           | 5c1v_A   | 5c1v_B      |
| 23           | 2lep_A   | 4hdd_A      | 52           | 5f5r_B   | 5f3k_A      |
| 24           | 2mwf_A   | 2nnt_A      | 53           | 5ond_A   | 6c6s_D      |
| 25           | 2p3v_A** | 2p3v_D**    | 54           | 2c1v_B   | 2c1u_C      |
| 26           | 2qqj_A   | 4qds_A      | 55           | 3ews_A   | 3g0h_A      |
| 27           | 2uy7_D   | 5flu_E      | 56           | 2ged_A   | 1nrj_B      |
| 28           | 2vfx_L** | 3gmh_L**    |              |          |             |
| 29           | 4phq_A   | 2wcd_X      |              |          |             |
